# Supplementary material for: Syrphidae of Southern Illinois: Diversity, floral associations, and preliminary assessment of their efficacy as pollinators
Source: Biodivers Data J. 2020 Oct 29;8:e57331. doi: 10.3897/BDJ.8.e57331 (PMC7644652; doi:10.3897/BDJ.8.e57331)
Supplement: Supplementary material 1 — Table of localities [file bdj-08-e57331-s001.xlsx]

## Sheet: Data Resources (site table)
Country	State	County	Site Name	Latitude	Longitude	Habitat
USA	IL	Alexander	Shawnee NF Clear Ck Swamp	37.3039	-89.4042	Wetland
USA	IL	Alexander	Shawnee NF Clear Creek	37.3044	-89.4042	Wetland
USA	IL	Alexander	Shawnee NF Gravel Tatum Rd	37.2763	-89.2877	Forest
USA	IL	Alexander	Shawnee NF Mill Creek Rd	37.33	-89.3186	Forest
USA	IL	Alexander	Shawnee NF Ozark Hill Prairie	37.3133	-89.3672	Grassland
USA	IL	Alexander	Shawnee NF Provo Cemetery	37.2668	-89.2725	Grassland
USA	IL	Gallatin	Old Shawneetown Riverside	37.6979	-88.1329	River
USA	IL	Gallatin	Shawnee NF High Knob	37.6007	-88.3284	Glade
USA	IL	Gallatin	Shawnee NF Karbers Rdg Rd	37.6102	-88.2707	Forest
USA	IL	Gallatin	Shawnee NF Pounds Lake	37.6156	-88.2739	Lake/Pond
USA	IL	Gallatin	Shawnee NF Rim Rock Trail	37.6028	-88.2784	Glade
USA	IL	Gallatin	Shawnee NF Saline Landing	37.6575	-88.1625	River
USA	IL	Gallatin	Shwnee NF High Knob Rdsd	37.5961	-88.3379	Lawn
USA	IL	Hardin	IDNR LaFarge Lmestne Glade	37.4843	-88.1018	Glade
USA	IL	Hardin	Shawnee Cadiz&Rd 1793	37.5763	-88.2997	Forest
USA	IL	Hardin	Shawnee NF 2.3km E Hicks	37.544	-88.3476	Grassland
USA	IL	Hardin	Shawnee NF Basset Schl pwrln	37.5272	-88.2989	Powerline
USA	IL	Hardin	Shawnee NF Basset School Rd	37.5272	-88.2989	Forest
USA	IL	Hardin	Shawnee NF Whoopie Cat	37.4746	-88.3102	Glade
USA	IL	Hardin	Shawnee Whoopie Cat Lake	37.4815	-88.3228	Forest
USA	IL	Hardin	Shwnee Irn Furn Rd & 1736	37.4884	-88.3054	Forest
USA	IL	Jackson	Green Earth Oakland Prsv	37.7409	-89.2275	Grassland
USA	IL	Jackson	IDNR De Soto Prairie	38.8537	-89.2309	Grassland
USA	IL	Jackson	Rd to State of IL Site	37.874	-89.5071	Grassland
USA	IL	Jackson	Shawnee Ltl Grnd Can Floor	37.6872	-89.3974	Forest
USA	IL	Jackson	Shawnee Ltl Grnd Can N dry	37.6862	-89.3965	Forest
USA	IL	Jackson	Shawnee NF 3km S Etherton	37.659	-89.3189	Powerline
USA	IL	Jackson	Shawnee NF Cove Hollow	37.64	-89.2926	Forest
USA	IL	Jackson	Shawnee NF Fountain Bluff	37.6936	-89.499	Forest
USA	IL	Jackson	Shawnee NF State of IL Enter	37.867	-89.5379	Forest
USA	IL	Jackson	Shawnee NF State of IL Square	37.8663	-89.5425	Grassland
USA	IL	Jackson	Shawnee Rt3 1.6km S 149	37.7422	-89.4633	Grassland
USA	IL	Jackson	Shwnee lower Fountain Bluff	37.6898	-89.4984	Forest
USA	IL	Jackson	Shwnee Ltl Grnd Can Rdge	37.6819	-89.3959	Glade
USA	IL	Jackson	Shwnee NF State of IL Hunt	37.8671	-89.5425	Forest
USA	IL	Jackson	SIU Campus	37.7148	-89.2232	Lawn
USA	IL	Jackson	SIU Campus Lake	37.7083	-89.2231	Lake/Pond
USA	IL	Jackson	SIU Campus Lake West	37.7087	-89.2307	Lake/Pond
USA	IL	Jackson	SIU Campus Prairie Garden	37.7155	-89.2235	Grassland
USA	IL	Jackson	SIU Thompson Woods	37.714	-89.2201	Forest
USA	IL	Jackson	SIU Thompson Woods NW	37.7141	-89.2216	Forest
USA	IL	Johnson	IDNR Cave Creek Glade	37.3593	-88.886	Glade
USA	IL	Johnson	IDNR Ferne Clyffe Rnd Blff	37.528	-88.9771	Forest
USA	IL	Johnson	Shawnee Gum Springs Trl	37.4964	-88.7587	Forest
USA	IL	Johnson	Shawnee NF Bulge Hole	37.5024	-88.8935	Glade
USA	IL	Johnson	Shawnee NF Bulge Hole Esmnt	37.5016	-88.8925	Powerline
USA	IL	Johnson	Shawnee NF Grantsburg woods	37.4072	-88.7442	Wetland
USA	IL	Johnson	Shawnee NF Gum Springs Rd S	37.4813	-88.7695	unknown
USA	IL	Johnson	Shawnee NF Pakentuck	37.5177	-88.7394	Forest
USA	IL	Johnson	Shawnee NF Trigg Tower Rd	37.4858	-88.7365	Forest
USA	IL	Johnson	Shawnee Simpson Brns lime	37.4808	-88.7456	Glade
USA	IL	Johnson	Shawnee Simpson Brns sand	37.4796	-88.7395	Glade
USA	IL	Johnson	Shwnee Gum Springs E Brdge	37.4958	-88.7566	Forest
USA	IL	Johnson	Shwnee Lwr Trigg Tower Rd	37.4764	-88.7454	Forest
USA	IL	Johnson	Shwnee NF Dutchmans Lake	37.49	-88.914	Lake/Pond
USA	IL	Johnson	Shwnee Rt147 2k E Simpson	37.4594	-88.7293	Grassland
USA	IL	Johnson	Simpson IL Rushing Rd	37.4772	-88.7254	Forest
USA	IL	Johnson and Pope	Shawnee NF Pennant Bar	37.3885	-88.7017	Lake/Pond
USA	IL	Johnson and Pope	Shawnee Pennant Bar Hound	37.3843	-88.6974	Grassland
USA	IL	Johnson and Pope	Shwnee Pennant Bar FrnkHound	37.39	-88.707	Grassland
USA	IL	Johnson and Pope	Shwnee Pennant Bar Frnkln	37.3955	-88.7172	Grassland
USA	IL	Johnson and Pope	Shwnee Ranunculus Valley	37.3955	-88.7172	Forest
USA	IL	Pope	Appel Road	37.5624	-88.6715	Ag field
USA	IL	Pope	Shawnee Jackson Hollow	37.5115	-88.7095	Forest
USA	IL	Pope	Shawnee NF Bowman Bottoms	37.5134	-88.8773	Forest
USA	IL	Pope	Shawnee NF Bowman Pwerln	37.5069	-88.8887	Powerline
USA	IL	Pope	Shawnee NF Bowman&I-24	37.4906	-88.8926	Powerline
USA	IL	Pope	Shawnee NF Burden Falls	37.5635	-88.6423	Glade
USA	IL	Pope	Shawnee NF Caney Branch	37.579	-88.6238	Forest
USA	IL	Pope	Shawnee NF Double Branch	37.5125	-88.5883	Glade
USA	IL	Pope	Shawnee NF Jackson Falls	37.5101	-88.6822	Forest
USA	IL	Pope	Shawnee NF Lusk Creek	37.5305	-88.5708	Forest
USA	IL	Pope	Shawnee NF Lusk Creek Trlhd	37.5305	-88.5708	Forest
USA	IL	Pope	Shawnee NF McConnell Trct1	37.4989	-88.678	Lake/Pond
USA	IL	Pope	Shawnee NF McConnell Trct2	37.4991	-88.6831	Grassland
USA	IL	Pope	Shawnee NF Millstone Bluff	37.4675	-88.6877	Glade
USA	IL	Pope	Shawnee NF Norvell Rd	37.4634	-88.6235	Forest
USA	IL	Pope	Shawnee NF Odum Tract	37.4924	-88.8908	Grassland
USA	IL	Pope	Shawnee NF Robnett Barrens		-88.6068	Glade
USA	IL	Pope	Shawnee NF Rothamel Tract	37.3061	-88.6288	Grassland
USA	IL	Pope	Shawnee NF Walters Tract	37.5441	-88.146	Grassland
USA	IL	Pope	Shawnee NF Walters Tract Rd	37.5459	-88.1461	Grassland
USA	IL	Pope	Shawnee NF Willams Tower Rd	37.5794	-88.4699	Forest
USA	IL	Pope	Shawnee NF Williams Hill	37.5814	-88.4759	Grassland
USA	IL	Pope	Shawnee Rd 2.4k N Eddyville	37.5353	-88.5936	Grassland
USA	IL	Pope	Shwnee NF Willams Hill Rd	37.5776	-88.462	Forest
USA	IL	Pope	Shwnee Rt147 1.7k E Robbs	37.4624	-88.681	Grassland
USA	IL	Pope	Shwnee Smithland Dam Road	37.165	-88.4442	Forest
USA	IL	Pope	Shwnee Smithland Lock&Dam	37.1695	-88.4448	Forest
USA	IL	Randolph	Sparta Training Area Opp_101	38.1469	-89.7277	unknown
USA	IL	Randolph	Sparta Training Area Opp_104	38.1531	-89.7219	unknown
USA	IL	Randolph	Sparta Training Area Opp_104S	38.1476	-89.719	unknown
USA	IL	Randolph	Sparta Training Area Opp_108NW	38.1808	-89.7085	unknown
USA	IL	Randolph	Sparta Training Area Opp_109	38.1686	-89.7312	unknown
USA	IL	Randolph	Sparta Training Area Opp_110N	38.1695	-89.7123	unknown
USA	IL	Randolph	Sparta Training Area Opp_E 107	38.1687	-89.7128	unknown
USA	IL	Randolph	Sparta Training Area Opp_E 108	38.1703	-89.7171	unknown
USA	IL	Randolph	Sparta Training Area Opp_N 108	38.1758	-89.7134	unknown
USA	IL	Randolph	Sparta Training Area Opp_N108 Lake	38.1779	-89.7075	unknown
USA	IL	Randolph	Sparta Training Area Opp_W 105	38.1618	-89.7347	unknown
USA	IL	Randolph	Sparta Training Area Opp_W 108	38.1735	-89.7191	unknown
USA	IL	Randolph	Sparta Training Area 105_1	38.1551	-89.7314	Grassland
USA	IL	Randolph	Sparta Training Area 108_1	38.1746	-89.7156	Grassland
USA	IL	Randolph	Sparta Training Area 109_1	38.1691	-89.7305	Grassland
USA	IL	Randolph	Sparta Training Area 109_2	38.1664	-89.7328	Grassland
USA	IL	Randolph	Sparta Training Area 201_1	38.1387	-89.7304	Grassland
USA	IL	Randolph	Sparta Training Area 201_2	38.141	-89.7341	Grassland
USA	IL	Randolph	Sparta Training Area 202_1	38.1428	-89.7346	Grassland
USA	IL	Randolph	Sparta Training Area 202_2	38.1438	-89.7249	Grassland
USA	IL	Saline	Liberty 4km SW Harrisburg	37.707	-88.5714	Lawn
USA	IL	Saline	Shawnee NF Cave Hill	37.6724	-88.4239	Glade
USA	IL	Saline	Shawnee NF Eagle Mtn ORV	37.667	-88.4237	Forest
USA	IL	Saline	Shawnee NF Whitesville Rd	37.684	-88.4729	Ag field
USA	IL	Saline	Shawnee Tower Rock Trail	37.4581	-88.2309	Forest
USA	IL	Saline	Shwnee Karbers&Sprkshll Rd	37.5905	-88.2872	Forest
USA	IL	Union	IDNR TOT Meadow	37.4885	-89.3494	Grassland
USA	IL	Union	IDNR TOT South Picnic	37.4832	-89.3591	Forest
USA	IL	Union	Railroad 1.5km S Ware hwy3	37.4356	-89.3926	Forest
USA	IL	Union	Refuge Road 3km SE Ware	37.4338	-89.3679	Lake/Pond
USA	IL	Union	Shawnee NF Bald Knob	37.553	-89.3454	Grassland
USA	IL	Union	Shawnee NF Clear Springs	37.6174	-89.4189	Forest
USA	IL	Union	Shawnee NF Clear Springs Rd	37.613	-89.4232	Forest
USA	IL	Union	Shawnee NF Inspiration Point	37.5856	-89.4362	Glade
USA	IL	Union	Shawnee NF Kaolin Rd	37.4835	-89.2596	Lake/Pond
USA	IL	Union	Shawnee NF Oakwood Bottoms	37.6726	-89.4376	Wetland
USA	IL	Union	Shawnee NF Rattlesnake Ferry	37.5957	-89.3864	Forest
USA	IL	Union	Shawnee NF Snake Road	37.5811	-89.4395	Wetland
USA	IL	Union	Shawnee NF State Forest Rd	37.4975	-89.406	Ag field
USA	IL	Union	Shawnee Snake Road South	37.5456	-89.4393	Forest
USA	IL	Union	Shwnee Clear Springs PnHlls Rd	37.5796	-89.4334	Forest
USA	IL	Union	Shwnee NF Oakwood Bottoms	37.6733	-89.4584	Wetland
USA	IL	Union	Shwnee Pine Hills Rsrch Ar	37.586	-89.4353	Forest
USA	IL	Williamson	CONWR 148 ROW	37.6626	-89.0205	Forest
USA	IL	Williamson	CONWR 2.6k W Wolf Crk	37.6245	-89.0791	Forest
USA	IL	Williamson	CONWR 2D Industrial	37.7305	-89.053	Industrial
USA	IL	Williamson	CONWR A41 Grazing Site	37.6595	-89.0566	Pasture
USA	IL	Williamson	CONWR Bass Pond	37.6945	-89.0584	Grassland
USA	IL	Williamson	CONWR Hampton North	37.7004	-89.0649	Grassland
USA	IL	Williamson	CONWR Hampton Roadside	37.7007	-89.0685	Grassland
USA	IL	Williamson	CONWR Hampton South	37.6964	-89.0642	Grassland
USA	IL	Williamson	CONWR Headquarters Prairie	37.7197	-89.0211	Grassland
USA	IL	Williamson	CONWR Heron Flatts	37.6905	-89.0249	Wetland
USA	IL	Williamson	CONWR Ind Site N Vis Cen	37.7223	-89.0213	Grassland
USA	IL	Williamson	CONWR Line 11	37.6364	-89.1013	Forest
USA	IL	Williamson	CONWR Line 11 Rd	37.6361	-89.1001	Forest
USA	IL	Williamson	CONWR Line 9	37.6078	-89.1032	Forest
USA	IL	Williamson	CONWR NE Pasture	37.7131	-88.9883	Pasture
USA	IL	Williamson	CONWR NE Swamp	37.7033	-88.9778	Wetland
USA	IL	Williamson	CONWR North Prairie	37.704	-89.1318	Grassland
USA	IL	Williamson	CONWR Ogden Flatts	37.6771	-89.0093	Roadside
USA	IL	Williamson	CONWR Ogden Rd Corn	37.6772	-89.0516	Ag field
USA	IL	Williamson	CONWR Ogden Road	37.6773	-89.0227	Grassland
USA	IL	Williamson	CONWR Pigeon Creek	37.7211	-89.0352	Grassland
USA	IL	Williamson	CONWR Pigeon Creek Pond	37.7153	-89.0074	Wetland
USA	IL	Williamson	CONWR Post Oak	37.731	-89.0486	Forest
USA	IL	Williamson	CONWR Propeller point	37.7086	-89.1022	Forest
USA	IL	Williamson	CONWR Rd 6.5k S Crtrvlle	37.7008	-89.0763	Forest
USA	IL	Williamson	CONWR Rocky Bluff	37.6419	-89.0977	Forest
USA	IL	Williamson	CONWR Rocky Bluff Rdsd	37.6419	-89.0977	Forest
USA	IL	Williamson	CONWR Rt148 11k SW Marion	37.6569	-89.0207	unknown
USA	IL	Williamson	CONWR Spillway&Wldlfe Rd	37.6743	-89.096	Forest
USA	IL	Williamson	CONWR Tacoma Lake Rd	37.6451	-89.1048	Lake/Pond
USA	IL	Williamson	CONWR Tacoma Lake Rd Opp	37.6444	-89.1029	Lake/Pond
USA	IL	Williamson	CONWR Turtle Pond	37.6785	-89.0565	Wetland
USA	IL	Williamson	CONWR Wildlife Rd Swamp	37.679	-89.0927	Wetland
USA	IL	Williamson	CONWR Wlf Crk Rd Adm Dr	37.736	-89.0584	Grassland
USA	IL	Williamson	CONWR Wolf Creek Causeway	37.7079	-89.0585	Lake/Pond
USA	IL	Williamson	Crab Orchard NWR A104C	37.7122	-89.0116	Field with Cover Crop
USA	IL	Williamson	Crab Orchard NWR A104T	37.7122	-89.0116	Field with Cover Crop
USA	IL	Williamson	Crab Orchard NWR A111C	37.7238	-89.0007	Field with Cover Crop
USA	IL	Williamson	Crab Orchard NWR A111T	37.7238	-89.0007	Field with Cover Crop
USA	IL	Williamson	Crab Orchard NWR A131C	37.7103	-89.0743	Field with Cover Crop
USA	IL	Williamson	Crab Orchard NWR A131T	37.7103	-88.9943	Field with Cover Crop
USA	IL	Williamson	Crab Orchard NWR A132C	37.711	-88.9927	Field with Cover Crop
USA	IL	Williamson	Crab Orchard NWR A132T	37.711	-88.9927	Field with Cover Crop
USA	IL	Williamson	Crab Orchard NWR A134C	37.7086	-88.9891	Field with Cover Crop
USA	IL	Williamson	Crab Orchard NWR A134T	37.7086	-88.9891	Field with Cover Crop
USA	IL	Williamson	Crab Orchard NWR A206C	37.6865	-88.9939	Field with Cover Crop
USA	IL	Williamson	Crab Orchard NWR A206T	37.6865	-88.9939	Field with Cover Crop
USA	IL	Williamson	Crab Orchard NWR A215C	37.679	-89.0018	Field with Cover Crop
USA	IL	Williamson	Crab Orchard NWR A215T	37.679	-89.0018	Field with Cover Crop
USA	IL	Williamson	Crab Orchard NWR A231C	37.6887	-89.009	Field with Cover Crop
USA	IL	Williamson	Crab Orchard NWR A231T	37.6887	-89.009	Field with Cover Crop
USA	IL	Williamson	Crab Orchard NWR A232C	37.6869	-89.0044	Field with Cover Crop
USA	IL	Williamson	Crab Orchard NWR A232T	37.6869	-89.0044	Field with Cover Crop
USA	IL	Williamson	Crab Orchard NWR A23WC	37.6975	-89.0193	Field with Cover Crop
USA	IL	Williamson	Crab Orchard NWR A23WT	37.6975	-89.0193	Field with Cover Crop
USA	IL	Williamson	Crab Orchard NWR A241C	37.6612	-89.0186	Field with Cover Crop
USA	IL	Williamson	Crab Orchard NWR A241T	37.6612	-89.0186	Field with Cover Crop
USA	IL	Williamson	Crab Orchard NWR A245C	37.6575	-89.02	Field with Cover Crop
USA	IL	Williamson	Crab Orchard NWR A245T	37.6575	-89.02	Field with Cover Crop
USA	IL	Williamson	Crab Orchard NWR A245TC	37.6575	-89.02	Field with Cover Crop
USA	IL	Williamson	Crab Orchard NWR A323C	37.6919	-89.0793	Field with Cover Crop
USA	IL	Williamson	Crab Orchard NWR A323T	37.6919	-89.0793	Field with Cover Crop
USA	IL	Williamson	Crab Orchard NWR A329C	37.6936	-89.0879	Field with Cover Crop
USA	IL	Williamson	Crab Orchard NWR A329T	37.6936	-89.0879	Field with Cover Crop
USA	IL	Williamson	Crab Orchard NWR A344C	37.6829	-89.0603	Field with Cover Crop
USA	IL	Williamson	Crab Orchard NWR A344T	37.6829	-89.0603	Field with Cover Crop
USA	IL	Williamson	Crab Orchard NWR A351C	37.692	-89.0743	Field with Cover Crop
USA	IL	Williamson	Crab Orchard NWR A351T	37.692	-89.0743	Field with Cover Crop
USA	IL	Williamson	Crab Orchard NWR A382C	37.6626	-89.0428	Field with Cover Crop
USA	IL	Williamson	Crab Orchard NWR A382T	37.6626	-89.0428	Field with Cover Crop
USA	IL	Williamson	Crab Orchard NWR A613C	37.7292	-89.043	Field with Cover Crop
USA	IL	Williamson	Crab Orchard NWR A613T	37.7292	-89.043	Field with Cover Crop
USA	IL	Williamson	Crab Orchard NWR A615C	37.7244	-89.043	Field with Cover Crop
USA	IL	Williamson	Crab Orchard NWR A615T	37.7244	-89.043	Field with Cover Crop
USA	IL	Williamson	Crab Orchard NWR A6W1C	37.7183	-89.0568	Field with Cover Crop
USA	IL	Williamson	Crab Orchard NWR A6W1T	37.7183	-89.0568	Field with Cover Crop
USA	IL	Williamson	Crab Orchard NWR B141C	37.7092	-89.094	Field with Cover Crop
USA	IL	Williamson	Crab Orchard NWR B141T	37.7092	-89.094	Field with Cover Crop
USA	IL	Williamson	Crab Orchard NWR B2E2C	37.7386	-89.0868	Field with Cover Crop
USA	IL	Williamson	Crab Orchard NWR B2E2T	37.7386	-89.0868	Field with Cover Crop
USA	IL	Williamson	Crab Orchard NWR B2W5C	37.7367	-89.0972	Field with Cover Crop
USA	IL	Williamson	Crab Orchard NWR B2W5T	37.7367	-89.0972	Field with Cover Crop
USA	IL	Williamson	Crab Orchard NWR B87C	37.7508	-89.139	Field with Cover Crop
USA	IL	Williamson	Crab Orchard NWR B87T	37.7508	-89.139	Field with Cover Crop
USA	IL	Williamson	Crab Orchard NWR B88C	37.7466	-89.1411	Field with Cover Crop
USA	IL	Williamson	Crab Orchard NWR B88T	37.7466	-89.1411	Field with Cover Crop
USA	IL	Williamson	Martha Avenue Makanda IL	37.6164	-89.1044	Lawn
USA	IL	Williamson	Milkweed Valley	37.6476	-89.1434	Lake/Pond
USA	IL	Williamson	SIU TONEC Oikos	37.6229	-89.1573	Forest
